# Supplementary material for: Intraspecific variation in cadmium tolerance and accumulation of a high-biomass tropical tree Averrhoa carambola L.: implication for phytoextraction
Source: Royal Society of Chemistry journal article supplement (doi:10.1039/c1em10054h), 2011-01-01
Supplement: c1em10054h.pdf [file c1em10054h.pdf]

### Supplementary text (details of RAPD analysis)

Total DNA was extracted from fresh young leaves using a hexadecyltrimethylammonium bromide (CTAB) protocol adapted from Lodhi et al. (1994). In detail, young leaves were collected from the healthy uniform seedlings grown hydroponically in a 0.25-strength Hoagland's solution. The sample of each cultivar leaves (fresh weight, 1 g) was a composite of at least 5 sub-samples, which were collected from different seedlings of the same cultivar. Thus, the RAPD band patterns were expected to be representative of cultivars; and only differences among cultivars, not within genotypes, would be observed. The concentration and purity of DNA were assessed spectrophotometrically (ND-1000, NanoDrop Technologies Inc., USA). The DNA samples had an  $OD_{260}/OD_{280}$  of 1.7 and  $OD_{260}/OD_{230}$  of 1.8 to 2.0. All DNA preparations were diluted in sterile double-distilled water to a uniform DNA concentration of  $50 \text{ ng } \mu\text{L}^{-1}$  for RAPD analysis and stored at  $4^{\circ}\text{C}$  until use.

Thirteen 10-mer arbitrary primers (Table S1; Sangon Inc., Shanghai, China) that gave clear and consistent amplification products were used for PCR amplification. The PCR reaction mixtures had a total volume of 25  $\mu\text{L}$ . Each mixture contained 0.3  $\mu\text{L}$  Taq DNA polymerase ( $5 \text{ U } \mu\text{L}^{-1}$ , TAKARA), 0.5  $\mu\text{L}$  primer ( $10 \text{ } \mu\text{mol L}^{-1}$ ; Sangon Inc., Shanghai, China), 0.5  $\mu\text{L}$  each dNTP ( $10 \text{ mmol L}^{-1}$ , TAKARA), 2.5  $\mu\text{L}$  appropriate  $10\times$  reaction buffer (including  $\text{MgCl}_2$ , TAKARA) and 2.0  $\mu\text{L}$  template DNA. Reactions were performed in a PTC 200 thermal cycler (Bio-RAD Laboratories Inc., USA), and programmed as follows: 5 min at  $94^{\circ}\text{C}$  for initial denaturation, 40 cycles of 15 s at  $94^{\circ}\text{C}$  (denaturation), 30 s at  $36^{\circ}\text{C}$  (annealing), and 1 min at  $72^{\circ}\text{C}$  (extension), and a final extension at  $72^{\circ}\text{C}$  for 10 min. The amplification products were visualized on 1.5% agarose gels stained with ethidium bromide, using standard methods. RAPD fragments were scored as present (+) or absent (-).

### References

- M. A. Lodhi, G. N. Ye, N. F. Weeden and B. I. Reisch, *Plant Mol. Biol. Rept.*, 1994, **12**, 6-13.

**Table S1** Specific RAPD fragments among the 17 carambola cultivars

|                        | S17                             | S19                | S43                | S79                | S83                | S85                | S103               | S120               | S121               | S147               | S151               | S155               | S176               |
|------------------------|---------------------------------|--------------------|--------------------|--------------------|--------------------|--------------------|--------------------|--------------------|--------------------|--------------------|--------------------|--------------------|--------------------|
| Sequence<br>(5' to 3') | AGGGA<br>ACGAG                  | ACCCC<br>CGAAG     | GTCGC<br>CGTCA     | GTTGC<br>CAGCC     | GAGCC<br>CTCCA     | CTGAG<br>ACGGA     | AGACG<br>TCCAC     | GGGAG<br>ACATC     | ACGGA<br>TCC TG    | AGATG<br>CAGCC     | GAGTC<br>TCAGG     | ACGCA<br>CAACC     | TCTC<br>CGCCC<br>T |
| B2                     |                                 |                    | +I <sub>1200</sub> |                    | -I <sub>750</sub>  |                    | -I <sub>800</sub>  | -I <sub>1500</sub> |                    |                    |                    |                    | +I <sub>1400</sub> |
| B10                    |                                 |                    |                    | +I <sub>700</sub>  |                    |                    |                    |                    |                    |                    |                    | +I <sub>1500</sub> |                    |
| B17                    |                                 |                    |                    |                    |                    |                    |                    |                    |                    |                    |                    |                    | -I <sub>800</sub>  |
| DGT                    |                                 |                    | -I <sub>2000</sub> |                    | +I <sub>850</sub>  | +I <sub>300</sub>  |                    | +I <sub>850</sub>  | +I <sub>1400</sub> |                    |                    |                    |                    |
| DGY                    |                                 |                    | +I <sub>700</sub>  |                    |                    | +I <sub>900</sub>  |                    |                    |                    |                    |                    | -I <sub>1200</sub> | +I <sub>480</sub>  |
| ERL                    |                                 |                    |                    | +I <sub>400</sub>  |                    |                    | -I <sub>500</sub>  |                    |                    |                    |                    |                    | -I <sub>480</sub>  |
| LS                     |                                 |                    | -I <sub>900</sub>  |                    |                    |                    |                    |                    |                    | -I <sub>400</sub>  |                    | +I <sub>600</sub>  |                    |
| QGS                    |                                 | +I <sub>650</sub>  | +I <sub>600</sub>  |                    |                    | -I <sub>650</sub>  |                    |                    |                    |                    |                    | -I <sub>750</sub>  |                    |
| TG                     | -I <sub>1500</sub>              |                    |                    |                    |                    | -I <sub>300</sub>  | -I <sub>1200</sub> | +I <sub>1300</sub> |                    |                    |                    |                    | +I <sub>150</sub>  |
| TN1                    |                                 |                    | -I <sub>1200</sub> | -I <sub>1600</sub> | +I <sub>750</sub>  | -I <sub>900</sub>  | -I <sub>1800</sub> | +I <sub>2200</sub> |                    | +I <sub>350</sub>  | -I <sub>1500</sub> |                    |                    |
| TN2                    |                                 |                    | -I <sub>800</sub>  | -I <sub>700</sub>  |                    |                    |                    |                    |                    |                    |                    | +I <sub>1000</sub> |                    |
| TN4                    |                                 | +I <sub>1600</sub> |                    |                    |                    |                    |                    |                    |                    |                    |                    |                    |                    |
| WCT                    | +I <sub>1500</sub> <sup>#</sup> | -I <sub>1600</sub> | -I <sub>600</sub>  |                    | +I <sub>1300</sub> | -I <sub>700</sub>  | -I <sub>650</sub>  |                    | -I <sub>1400</sub> |                    |                    |                    | +I <sub>650</sub>  |
| XH                     |                                 |                    |                    | NB                 |                    |                    | NB                 |                    |                    | -I <sub>350</sub>  |                    |                    |                    |
| XHU                    |                                 |                    |                    |                    |                    | +I <sub>1100</sub> |                    |                    |                    | -I <sub>300</sub>  | +I <sub>600</sub>  |                    | -I <sub>650</sub>  |
| XM                     |                                 |                    | -I <sub>900</sub>  |                    |                    | +I <sub>650</sub>  |                    |                    | -I <sub>650</sub>  | +I <sub>1700</sub> |                    |                    |                    |
| ZD                     |                                 |                    | -I <sub>400</sub>  |                    |                    | -I <sub>350</sub>  |                    |                    | +I <sub>650</sub>  | -I <sub>900</sub>  |                    |                    | +I <sub>900</sub>  |

<sup>#</sup> Specific RAPD fragments were recorded for their presence (+) or absence (-) of the primer-cultivar combinations. The number in the lower right corner represents the base pairs of a band. Although no single RAPD primer could distinguish all cultivars, two or more primer combinations are required for cultivar identification

**Table S2** Selected properties of soils (mean  $\pm$  S.D.) collected from the field sites. Concentrations of Cd and OM contents are presented as mg kg<sup>-1</sup> (dry weight) and %, respectively

| Sampling<br>Location | pH               | OM Content       | Total Cd          | DTPA-Cd           |
|----------------------|------------------|------------------|-------------------|-------------------|
| S1                   | 4.9 $\pm$ 0.3 b* | 3.2 $\pm$ 0.3 b  | 0.3 $\pm$ 0.1 ab  | 0.02 $\pm$ 0.04 a |
| S2                   | 4.3 $\pm$ 0.6 a  | 4.4 $\pm$ 0.4 c  | 0.6 $\pm$ 0.3 c   | 0.3 $\pm$ 0.2 b   |
| S3                   | 6.7 $\pm$ 0.2 d  | 3.1 $\pm$ 0.5 ab | 0.4 $\pm$ 0.1 b   | 0.1 $\pm$ 0.1 a   |
| S4                   | 5.6 $\pm$ 0.6 c  | 2.5 $\pm$ 1.0 ab | 0.2 $\pm$ 0.1 a   | 0.02 $\pm$ 0.02 a |
| S5                   | 5.3 $\pm$ 0.4 c  | 5.5 $\pm$ 1.4 d  | 0.1 $\pm$ 0.04 a  | 0.1 $\pm$ 0.02 a  |
| S6                   | 7.6 $\pm$ 0.3 e  | 2.4 $\pm$ 0.6 a  | 0.3 $\pm$ 0.1 ab  | 0.04 $\pm$ 0.02 a |
| S7                   | 6.6 $\pm$ 0.4 d  | 3.0 $\pm$ 0.3 ab | 0.2 $\pm$ 0.1 ab  | 0.1 $\pm$ 0.1 a   |
| S8                   | 5.0 $\pm$ 0.3 b  | 2.7 $\pm$ 0.5 ab | 0.23 $\pm$ 0.03ab | 0.04 $\pm$ 0.02 a |

\*Numbers followed by different letters in the same column indicate significant differences ( $p < 0.05$ , LSD)
